# Supplementary material for: A FRET-based colorimetric and ratiometric fluorescent probe for the detection of Cu2+with a new trimethylindolin fluorophore
Source: Royal Society of Chemistry journal article supplement (doi:10.1039/c9nj02380a), 2019-01-01
Supplement: c9nj02380a1.pdf [file c9nj02380a1.pdf]

Supporting information for

**FRET-based colorimetric and ratiometric fluorescent probe  
for Cu<sup>2+</sup> with a new trimethylindolin fluorophore**

Jiao Zhang,<sup>a</sup> Mei Zhu,<sup>b</sup> Daoyong Jiang,<sup>a</sup> Han Zhang,<sup>a</sup> Luying Li,<sup>a</sup> Guoning Zhang,<sup>b</sup>  
Yucheng Wang,<sup>b</sup> Chao Feng,<sup>c</sup> Hong Zhao\*<sup>a</sup>

<sup>a</sup> School of Chemistry and Chemical Engineering, Southeast University, Nanjing,  
211189, China

<sup>b</sup> Institute of Medicinal Biotechnology, Chinese Academy of Medical Sciences and  
Peking Union Medical College, Beijing, 100050, China

<sup>c</sup> School of Materials and Chemical Engineering, Bengbu University, Bengbu 233030,  
P. R. China

\* Corresponding author E-mail address: [zhaohong@seu.edu.cn](mailto:zhaohong@seu.edu.cn)

## Contents

**Fig. S1** The overlap (shown with oblique stripes) between emission of the donor and absorption spectra of the acceptor.

**Fig. S2** A plot of absorbance of **RhF** against  $\text{Cu}^{2+}$  (0- 120  $\mu\text{M}$ ).

**Fig. S3** A plot of Bensei-Hildebrand obtained from the UV-Vis absorption.

**Fig. S4** Changes of the fluorescence spectra of **RhF** (10  $\mu\text{M}$ ) observed upon addition of various metal ions in a  $\text{CH}_3\text{CN}$ /aqueous HEPES buffer (10 mM, pH 7.3; 4:1, v/v).

**Fig. S5** Calculations for FRET efficiency.

**Fig. S6** Fluorescence titration spectra of **RhF** (10  $\mu\text{M}$ ) in the presence of different concentrations of  $\text{Cu}^{2+}$  (0-50 $\mu\text{M}$ ).

**Fig. S7** The plot of the emission intensity ratios of **RhF** at I582/I503 against  $\text{Cu}^{2+}$  (88-140 $\mu\text{M}$ ).

**Fig. S8** Effect of pH on probe for the detection of  $\text{Cu}^{2+}$ .

**Fig. S9** The changes of fluorescence intensity at 503 nm of probe **RhF** exposed to light for a long time.

**Fig. S10** Job's plot of probe **RhF** with  $\text{Cu}^{2+}$  in a  $\text{CH}_3\text{CN}$ /aqueous HEPES buffer (10 mM, pH=7.3; 4:1 v/v).

**Fig. S11** ESI-MS spectrum of probe **RhF-Cu<sup>2+</sup>** complex.

**Fig. S12**  $^1\text{H}$  NMR spectra of **RhF-Cu<sup>2+</sup>** (a) in  $\text{DMSO-d}_6$  with  $\text{D}_2\text{O}$  and **RhF** (b) in  $\text{DMSO-d}_6$ .

**Fig. S13.** XPS of as prepared samples: (A) survey spectra of **RhF-Cu<sup>2+</sup>** complex; (B)  $\text{Cu}2\text{p}$  of **RhF-Cu<sup>2+</sup>** complex.

**Fig. S14** IR spectral data of **RhF** and **RhF-Cu<sup>2+</sup>** complex.

**Fig. S15** Effect of water content on probe for the detection of  $\text{Cu}^{2+}$ .

**Fig. S16** ESI-MS spectrum of probe **RhF**.

**Fig. S17**  $^1\text{H}$  NMR Spectrum of probe **RhF**.

**Fig. S18**  $^{13}\text{C}$  NMR Spectrum of probe **RhF**.

**Table S1** Comparison of the recently reported probes for the detection of  $\text{Cu}^{2+}$ .

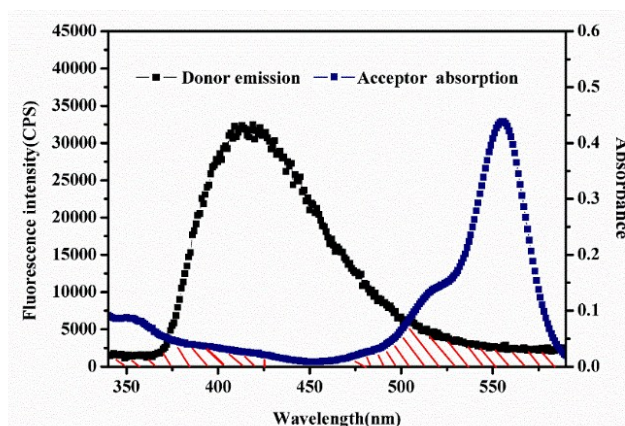

**Fig. S1** The overlap (shown with oblique stripes) between emission of the donor and absorption spectra of the acceptor, respectively.

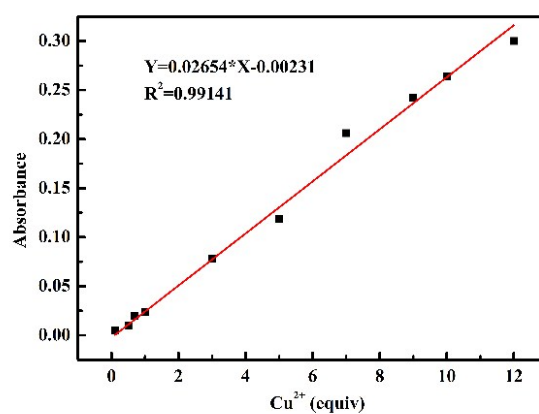

**Fig. S2** Absorbance plot of **RhF** against Cu<sup>2+</sup> concentration from 0 to 120  $\mu$ M.

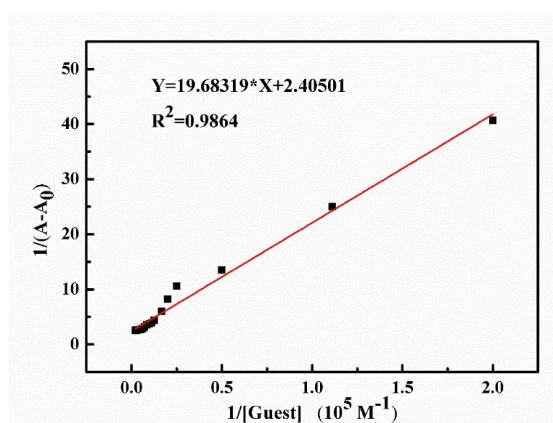

**Fig. S3** Bensei-Hildebrand plot of **RhF-Cu<sup>2+</sup>** complex obtained from the UV-Vis absorption (absorbance calculated from 555 nm) studies.

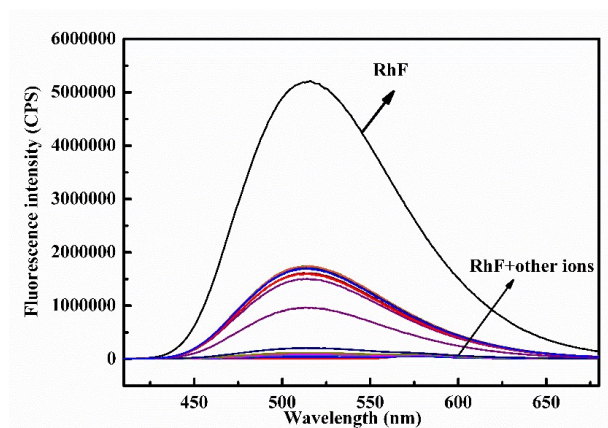

**Fig. S4** Changes of the fluorescence spectra of **RhF** (10  $\mu$ M) observed upon addition of various metal ions in a CH<sub>3</sub>CN/aqueous HEPES buffer (10 mM, pH 7.3; 4:1, v/v).

**Fig. S5** Calculations for FRET efficiency:

Energy transfer efficiency ( $\Phi_{ET}$ ) was evaluated through the following equation: <sup>1-4</sup>

$$\Phi_{ET} = 1 - (F'_D / F)$$

where  $F'_D$  and  $F_D$  denote the donor fluorescence intensity with and without an acceptor respectively in the presence of Cu<sup>2+</sup> ions.

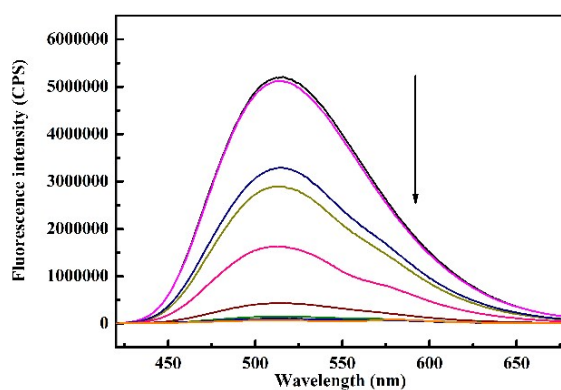

**Fig. S6** Fluorescence titration spectra of **RhF** (10  $\mu$ M) in the presence of different concentrations of Cu<sup>2+</sup> (0-50 $\mu$ M).  $\lambda_{exc}$  = 345 nm.

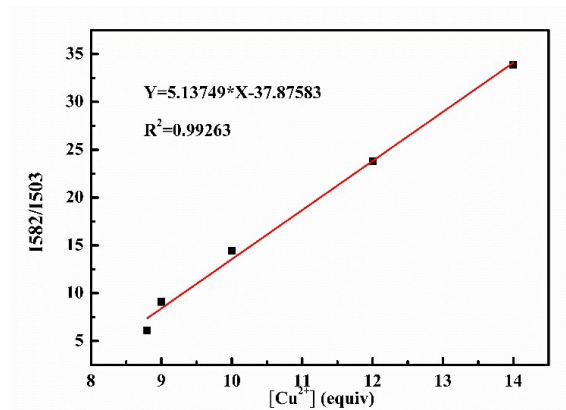

**Fig. S7** The plot of the emission intensity ratios of **RhF** at I582/I503 against Cu<sup>2+</sup> (88-140μM).

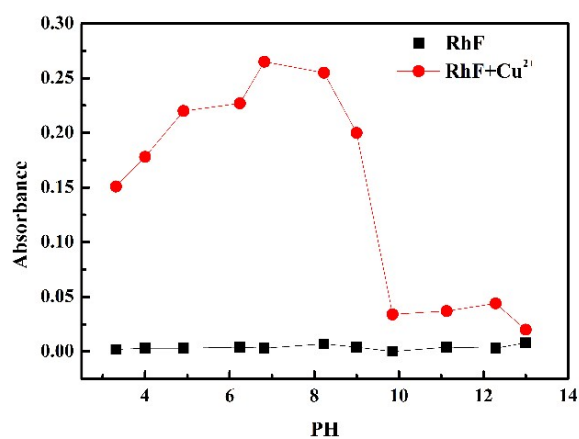

**Fig. S8** Effect of pH on probe for the detection of Cu<sup>2+</sup> (based on absorbance data).

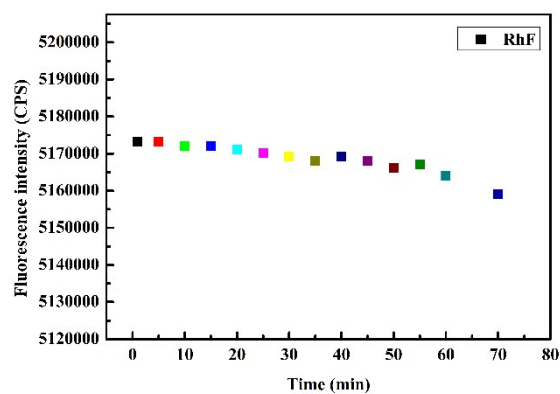

**Fig. S9** The changes of fluorescence intensity at 503 nm of probe **RhF** exposed to light for a long time.

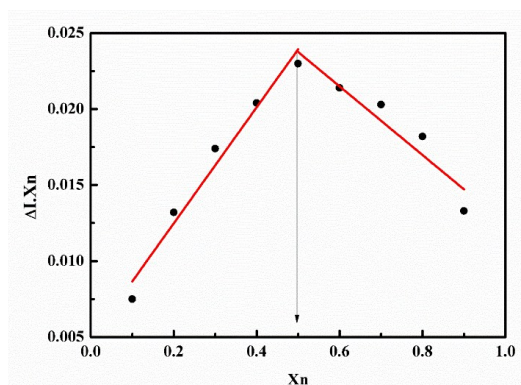

**Fig. S10** Job's plot of probe **RhF** with  $\text{Cu}^{2+}$  in a  $\text{CH}_3\text{CN}$ /aqueous HEPES buffer (10 mM, pH=7.3; 4:1 v/v). Where  $X_n$  is the mole fraction of **RhF** and  $\Delta I$  is the change ( $I-I_0$ ) in the absorbance in presence of  $\text{Cu}^{2+}$ . The total concentration of RhF and  $\text{Cu}^{2+}$  was  $20\mu\text{M}$ .

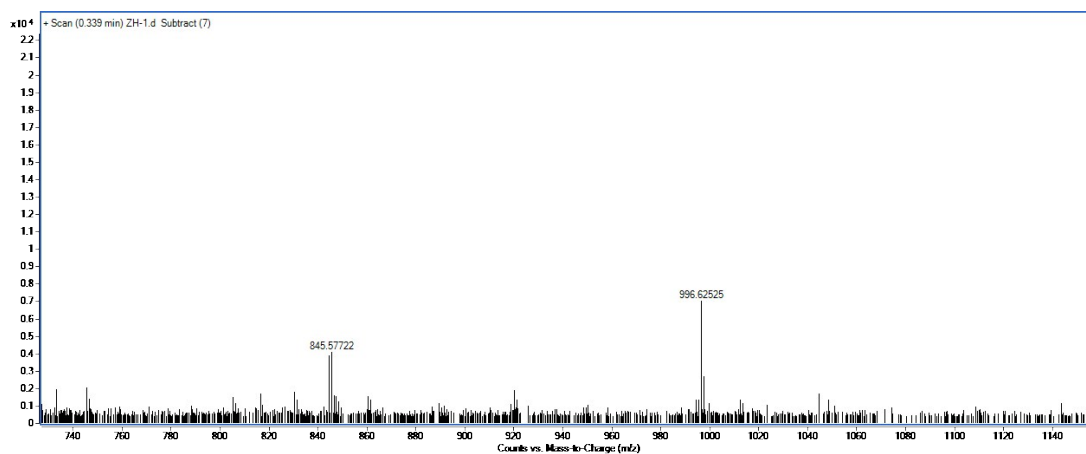

**Fig. S11** ESI-MS spectrum of probe **RhF-Cu<sup>2+</sup>** complex.

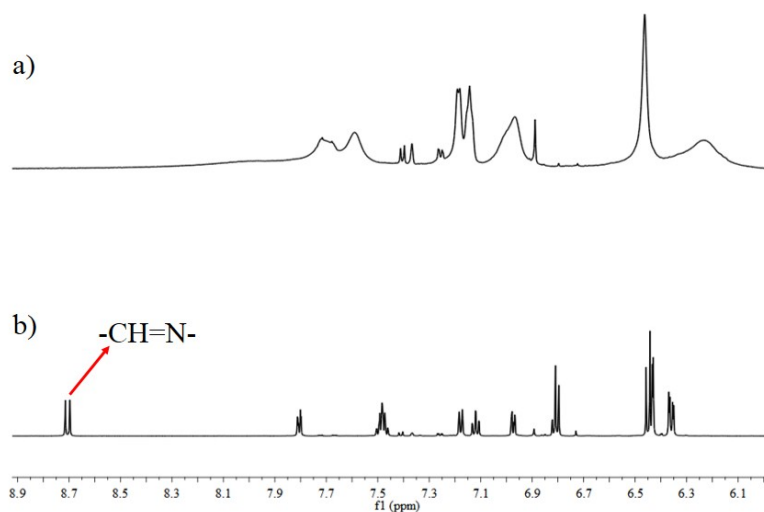

**Fig.S12** <sup>1</sup>H NMR spectra of **RhF-Cu<sup>2+</sup>** (a) in  $\text{DMSO-d}_6$  with  $\text{D}_2\text{O}$  and **RhF** (b) in  $\text{DMSO-d}_6$ .

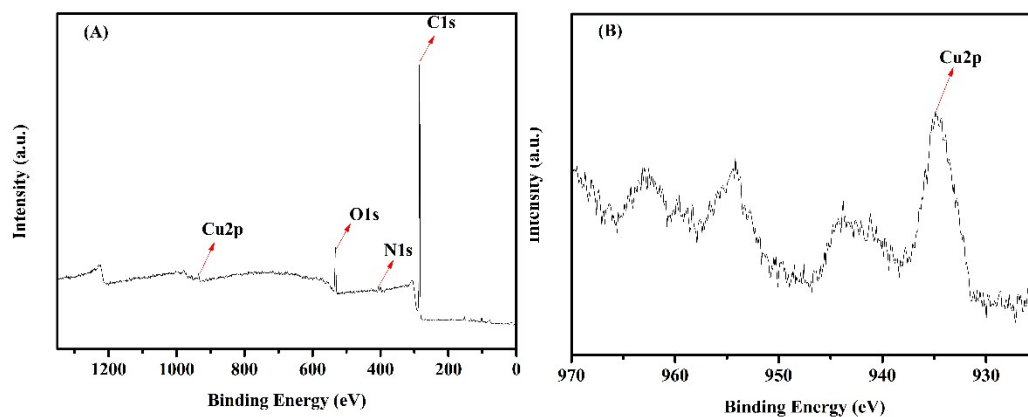

Fig. S13. XPS of as prepared samples: (A) survey spectra of  $\text{RhF-Cu}^{2+}$  complex; (B) Cu 2p of  $\text{RhF-Cu}^{2+}$  complex.

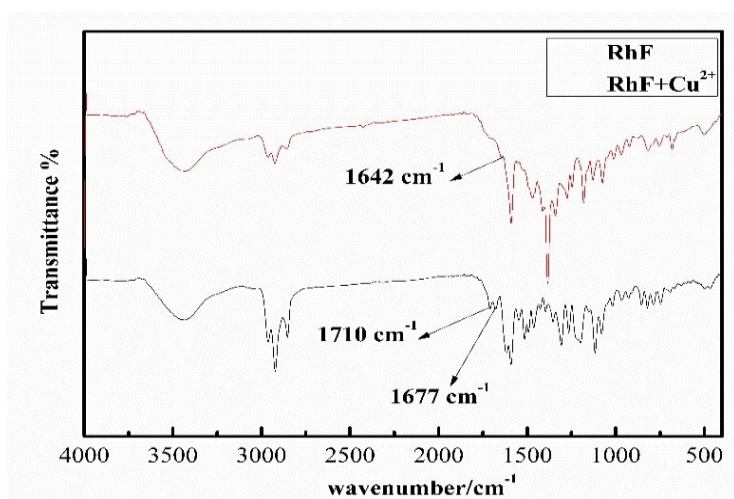

Fig.S14 IR spectral data of  $\text{RhF}$  and  $\text{RhF-Cu}^{2+}$  complex.

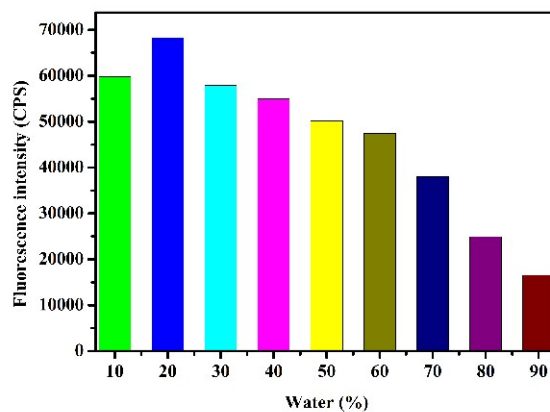

Fig. S15 Effect of water content on probe for the detection of  $\text{Cu}^{2+}$ .

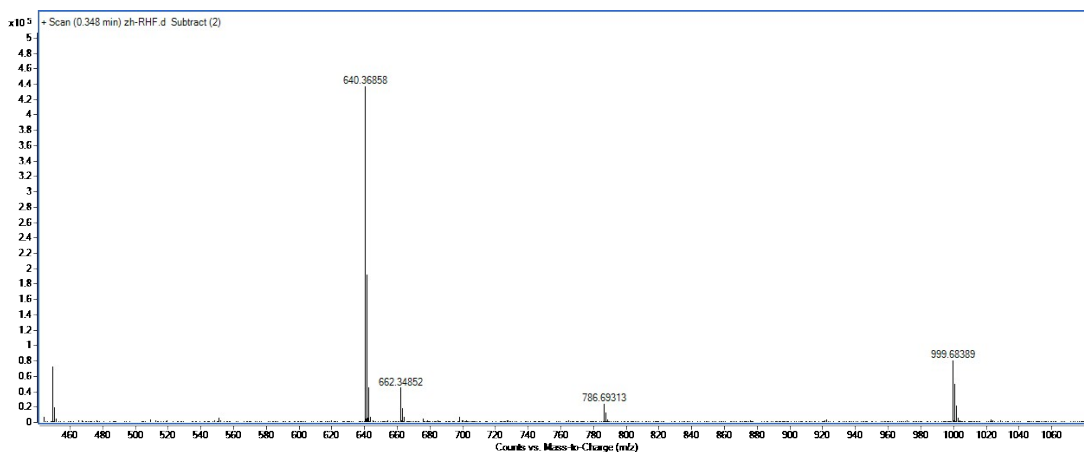

Fig. S16 ESI-MS spectrum of probe RhF.

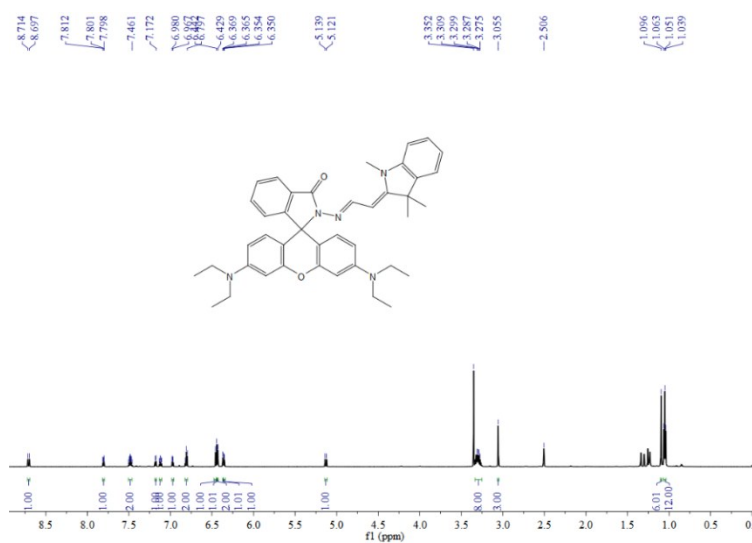

Fig. S17 <sup>1</sup>H NMR Spectrum of probe RhF.

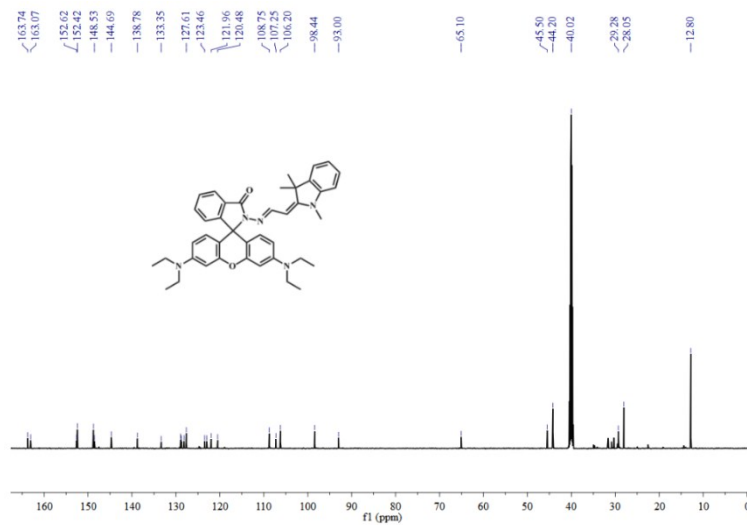

Fig. S18 <sup>13</sup>C NMR Spectrum of probe RhF.



**Table S1** Comparison of the recently reported probes for the detection of Cu<sup>2+</sup>.

| Probes                                                                              | $\lambda_{\text{ex}}/\lambda_{\text{em}}$<br>(nm) | Detection<br>Limit<br>( $\mu\text{M}$ ) | Working system                                                                | Operation<br>mode | Analytical<br>application:<br>test strips | Ref.         |
|-------------------------------------------------------------------------------------|---------------------------------------------------|-----------------------------------------|-------------------------------------------------------------------------------|-------------------|-------------------------------------------|--------------|
| 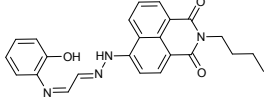   | 455/519                                           | 0.15                                    | CH <sub>3</sub> CN-H <sub>2</sub> O (70:30,<br>v/v, MOPS, 10 mM,<br>pH = 7.0) | Turn-ON           | NO                                        | [5]          |
|    | 290/<br>355、<br>470                               | 0.46                                    | CH <sub>3</sub> CN-H <sub>2</sub> O(3:2,<br>v/v,10 mM Tris-<br>HCl)           | Turn-OFF          | NO                                        | [6]          |
|    | 295/365                                           | 0.2                                     | CH <sub>3</sub> CN-H <sub>2</sub> O<br>(2:3,v/v)                              | Turn-ON           | NO                                        | [7]          |
|    | 376/439                                           | 14.5                                    | CH <sub>3</sub> CN                                                            | Turn-ON           | NO                                        | [8]          |
|   | 437/637                                           | 1.568                                   | CH <sub>3</sub> CN                                                            | Turn-ON           | NO                                        | [9]          |
|  | None                                              | 0.29                                    | CH <sub>3</sub> CN                                                            | Turn-ON           | NO                                        | [10]         |
|  | 435/532                                           | 0.052                                   | CH <sub>3</sub> CN-H <sub>2</sub> O (20:80,<br>v/v, pH=7.4)                   | Turn-ON           | NO                                        | [11]         |
|  | 419/524                                           | 13.05                                   | CH <sub>3</sub> CN-H <sub>2</sub> O (99:1,<br>v/v)                            | Turn-ON           | NO                                        | [12]         |
|  | 420/<br>540、<br>568                               | 0.12                                    | CH <sub>3</sub> CN-HEPES (1 :<br>1, v/v, 20 mM, pH=<br>7.4)                   | Turn-ON           | No                                        | [13]         |
|  | 345/<br>503、<br>582                               | 0.01168                                 | CH <sub>3</sub> CN-aqueous<br>HEPES buffer (4:1,<br>v/v, 10 mM,<br>PH=7.3)    | Turn-ON           | YES                                       | This<br>work |

## References

- 1 J. R. Lakowicz, *Topics in Fluorescence Spectroscopy Volume 2: Principles*, Kluwer Academic Publishers, New York, 2002.
- 2 D. Seth, A. Chakraborty, P. Setua, D. Chakrabarty, N. Sarkar, *The Journal of Physical Chemistry B*, 2005, 109, 12080-12085.
- 3 S. L. Gilat, A. Adronov, J. M. J. Fréchet, *Int. Ed. Angew. Chem., Int. Ed.* 1999, 38, 1422-1427.
- 4 M. H. Lee, D. T. Quang, H. S. Jung, J. Yoon, C.-H. Lee, J. S. Kim, *J. Org. Chem.* 2007, 72, 4242-4245.
- 5 Z. Chen, L. Wang, G. Zou, J. Tang, X. Cai, M. Teng and L. Chen, *Spectrochim Acta A Mol Biomol Spectrosc*, 2013, 105, 57-61.
- 6 Y. Zhang, X. Guo, X. Tian, A. Liu and L. Jia, *Sensors and Actuators B: Chemical*, 2015, 218, 37-41.
- 7 H. Diao, W. Niu, W. Liu, L. Feng and J. Xie, *Spectrochim Acta A Mol Biomol Spectrosc*, 2017, 170, 65-68.
- 8 S. Bayindir and M. Toprak, *Spectrochim Acta A Mol Biomol Spectrosc*, 2019, 213, 6-11.
- 9 W. Li, Y. Zhang, X. Gan, M. Yang, B. Mie, M. Fang, Q. Zhang, J. Yu, J. Wu, Y. Tian and H. Zhou, *Sensors and Actuators B: Chemical*, 2015, 206, 640-646.
- 10 Q. Hu, Y. Liu, Z. Li, R. Wen, Y. Gao, Y. Bei and Q. Zhu, *Tetrahedron Letters*, 2014, 55, 4912-4916.
- 11 X.-X. Hu, X.-L. Zheng, X.-X. Fan, Y.-T. Su, X.-Q. Zhan and H. Zheng, *Sensors and Actuators B: Chemical*, 2016, 227, 191-197.
- 12 S. Thavornpradit, J. Sirirak and N. Wanichacheva, *Journal of Photochemistry and Photobiology A: Chemistry*, 2016, 330, 55-63.
- 13 Z. Hu, J. Hu, Y. Cui, G. Wang, X. Zhang, K. Uvdal and H.-W. Gao, *Journal of Materials Chemistry B*, 2014, 2.
